# Supplementary material for: Identification of a novel salt tolerance gene in wild soybean by whole-genome sequencing
Source: PubMed Central journal article supplement — Nat Commun. 2014 Jul 9;5:4340. doi: 10.1038/ncomms5340 (PMC4104456; doi:10.1038/ncomms5340), 2014-07-09
Supplement: ncomms5340-s1.pdf [file ncomms5340-s1.pdf]

## Supplementary Information

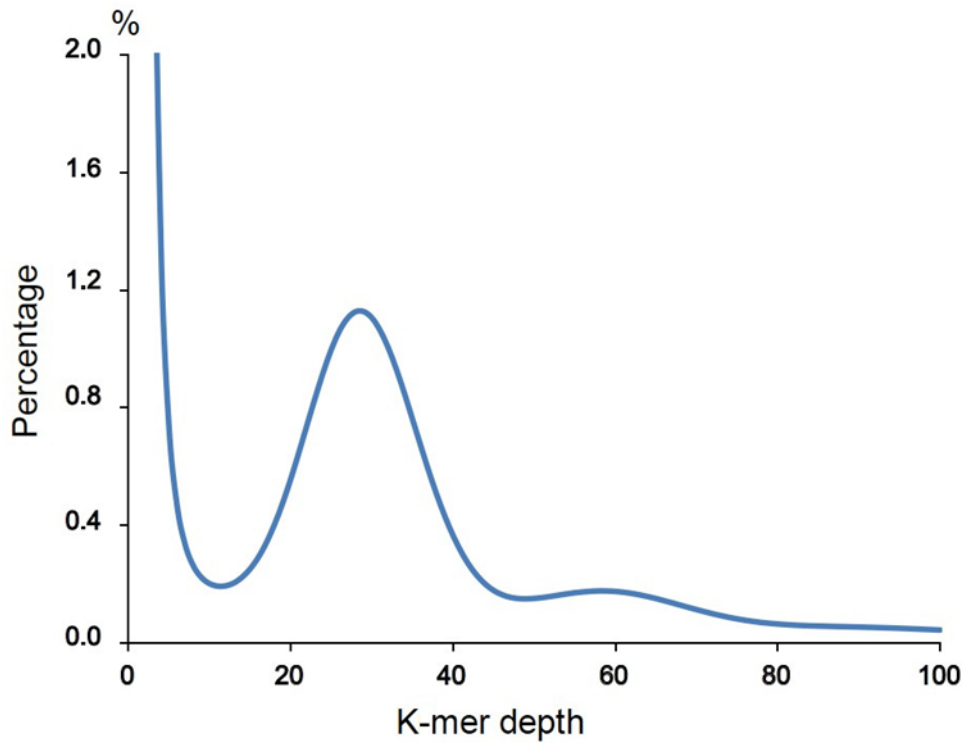

**Supplementary Figure 1.** K-mer analysis for estimating the genome size. The genome size of W05 is estimated by K-mer analysis using the Lander-Waterman algorithm<sup>1</sup>, in which  $G = N \times (L - K + 1) / D$ , where  $N$  is the total number of reads,  $L$  is the average length of reads, and  $K$  is equal to 17 in this case. This method is widely used to estimate the approximate genome size of plant species<sup>2</sup>. To reduce inaccuracy caused by sequencing errors and duplicated regions in the genome, only clean reads from short insert-size libraries are used. The detailed statistics of the K-mer analysis are as follows: 17-Mer number: 33,792,138,754; Peak depth: 29; Estimated genome size: 1,165,246,163 bp; Total base pair used: 44,112,249,666.

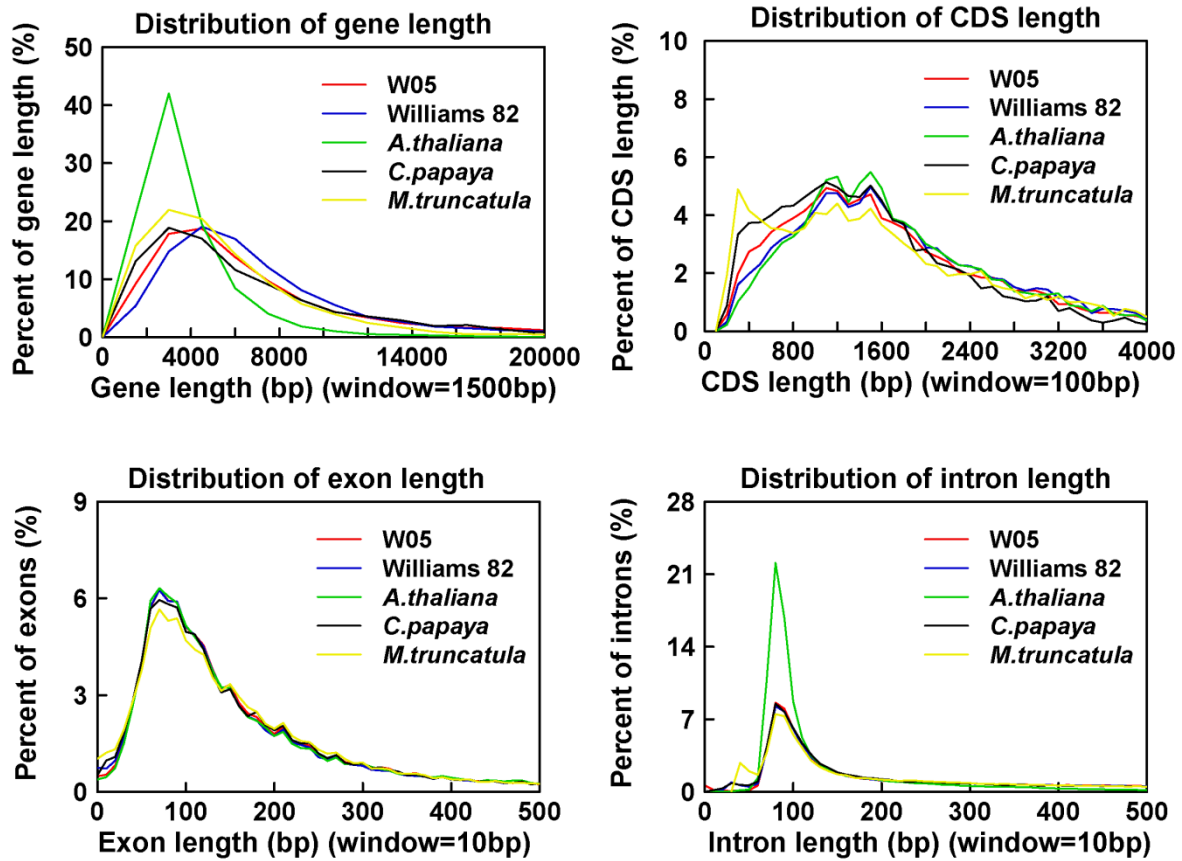

**Supplementary Figure 2.** Basic information of the gene model. Basic information including predicted gene length, CDS length, exon length, and intron length are collected and compared among the wild soybean accession W05 (this study), the cultivated soybean reference genome Williams 82 (Glyma1.1), *Medicago truncatula* (a close relative of alfalfa (*Medicago sativa*)), *Carica papaya* (papaya), and *Arabidopsis thaliana*.

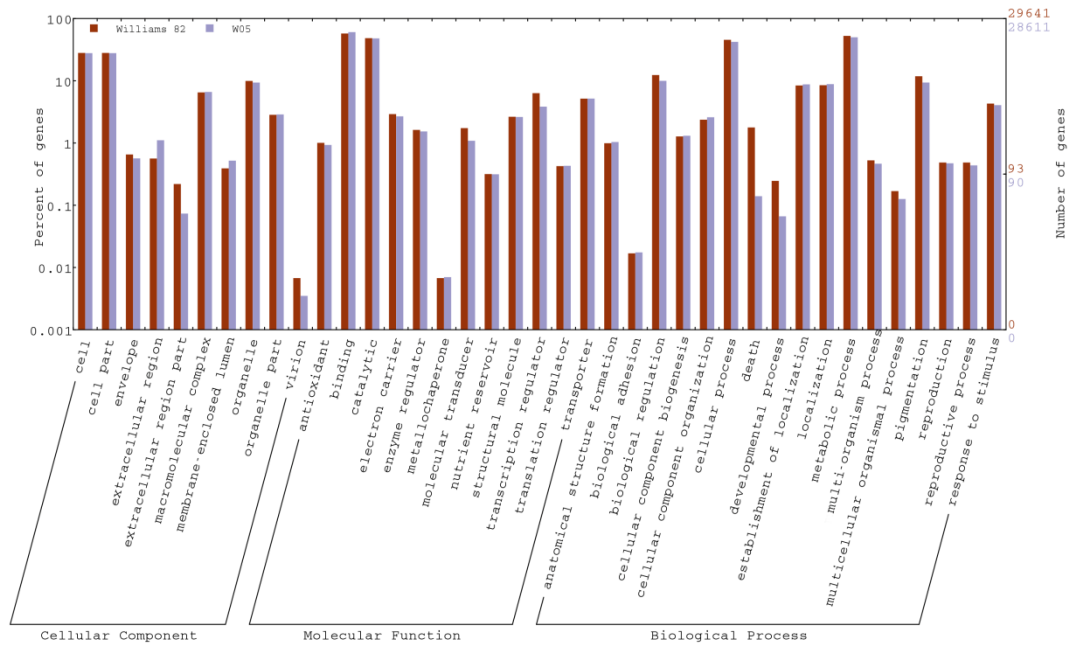

**Supplementary Figure 3.** Comparison of GO categories between W05 and Williams 82 annotated gene sets.

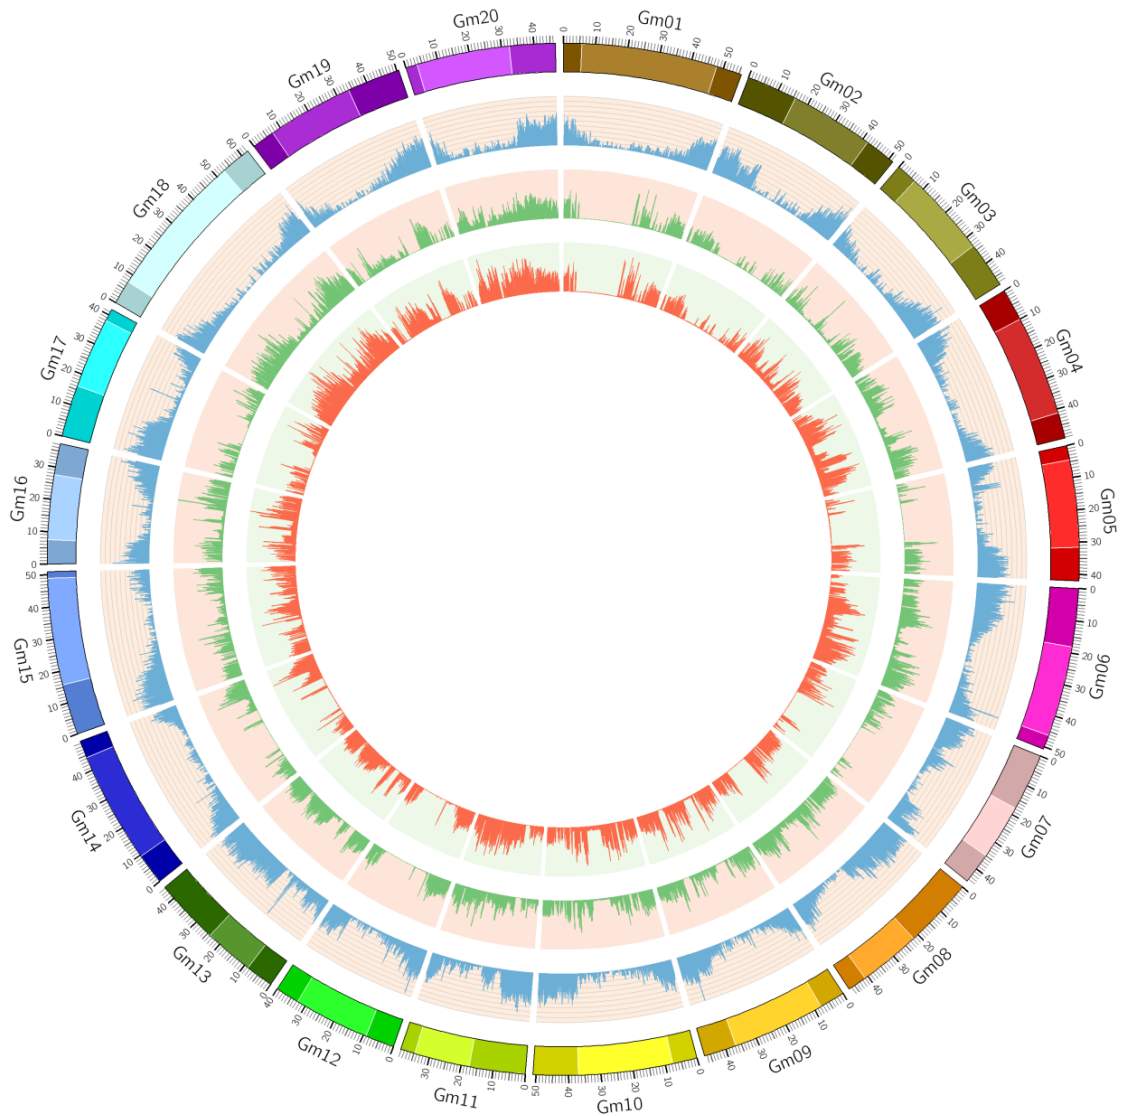

**Supplementary Figure 4.** SNP distribution within the soybean genome. SNP distribution is mapped to the reference genome Williams 82. Outermost circle: darker regions indicate the homo-chromatin regions located at the chromosome ends<sup>3</sup>; second circle: gene density; third circle: identified SNPs between the two parental lines (W05 and C08); and innermost circle: identified SNPs in the core panel of RI lines.

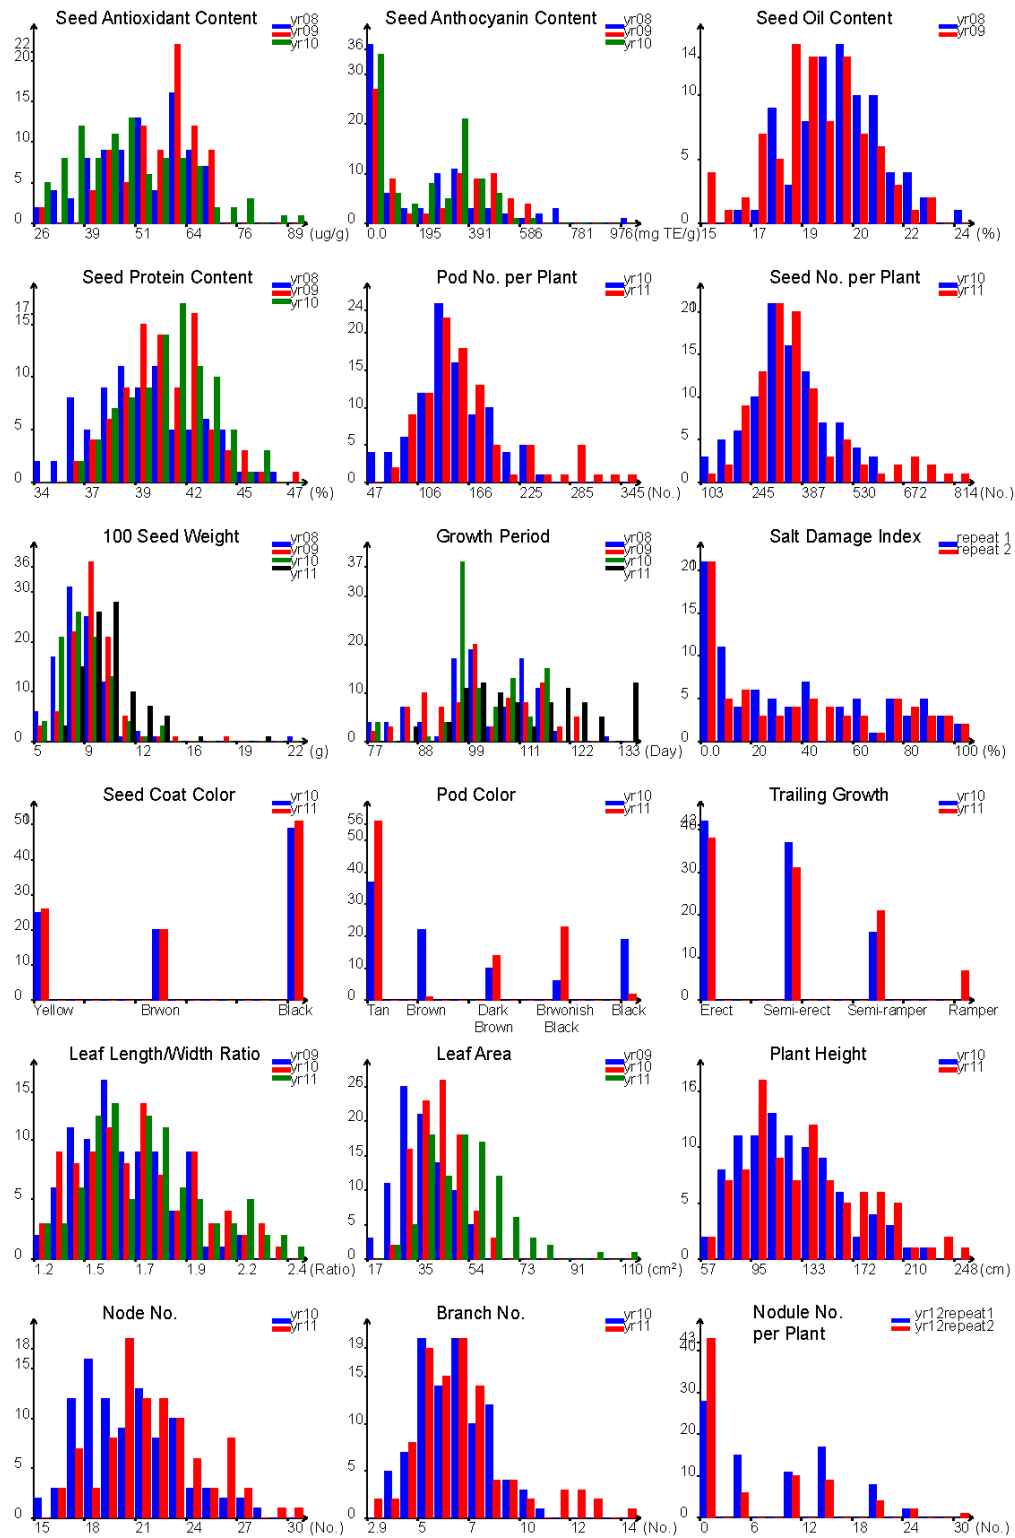

**Supplementary Figure 5.** Phenotype distributions of 96 core-panel RI lines and the two parents. Different colors indicate records based on data collected in different years (yr08: 2008, yr09: 2009, yr10: 2010, yr11: 2011, yr12: 2012).

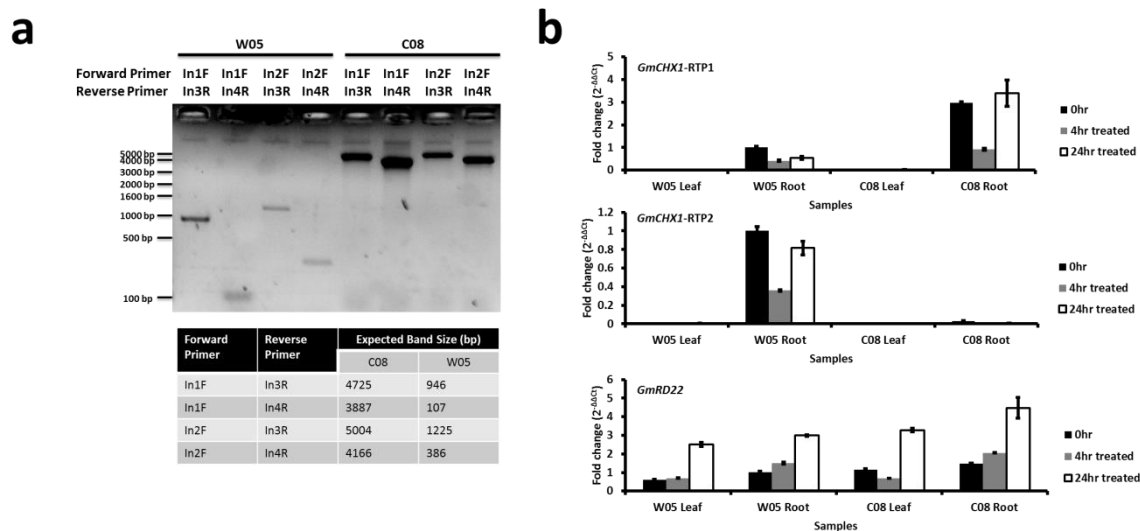

**Supplementary Figure 6.** An insertion of retrotransposon disrupted the *GmCHX1* gene in C08. **(a)** The insertion in the *GmCHX1* gene of C08 is shown by the larger PCR products in C08 compared to W05. Primer binding sites are marked in **Figure 2d** of the main text. **(b)** Real-time PCR studies of *GmCHX1* using primers specific to regions upstream (upper panel) or downstream (middle panel) of the insertion site depicted in C08, with or without NaCl treatment. Expression of the salt-inducible *GmRD22* (lower panel) was used as the quality control of RNA samples. The  $2^{-\Delta\Delta CT}$  method<sup>4</sup> is used to compare gene expression, using the soybean  $\alpha$ -tubulin gene (*Glyma20g27280*)<sup>5</sup> for normalization. The expression of *GmCHX1* in the root of W05 at 0 h is set to 1 for comparison. Error bar: standard errors. N=4. The sequences of the primers used are listed in **Supplementary Data File 2**. A lower extension temperature protocol for A-T rich templates is adopted to amplify the retrotransposon insertion<sup>6</sup>, with the following modifications. In brief, PCR is conducted in a 25  $\mu$ L reaction mixture containing 1X buffer, 1.8 mM MgCl<sub>2</sub>, 0.2 mM dNTPs, 0.1  $\mu$ M of each primer, 200 ng genomic DNA template and 0.75 U GoTaq<sup>®</sup> DNA polymerase. The thermal cycler is programmed with an initial 95°C for 2 min, followed by 40 cycles of 95°C for 30 s and 60°C for 6 min. PCR products are resolved on 1% agarose gel in 1X TAE buffer.



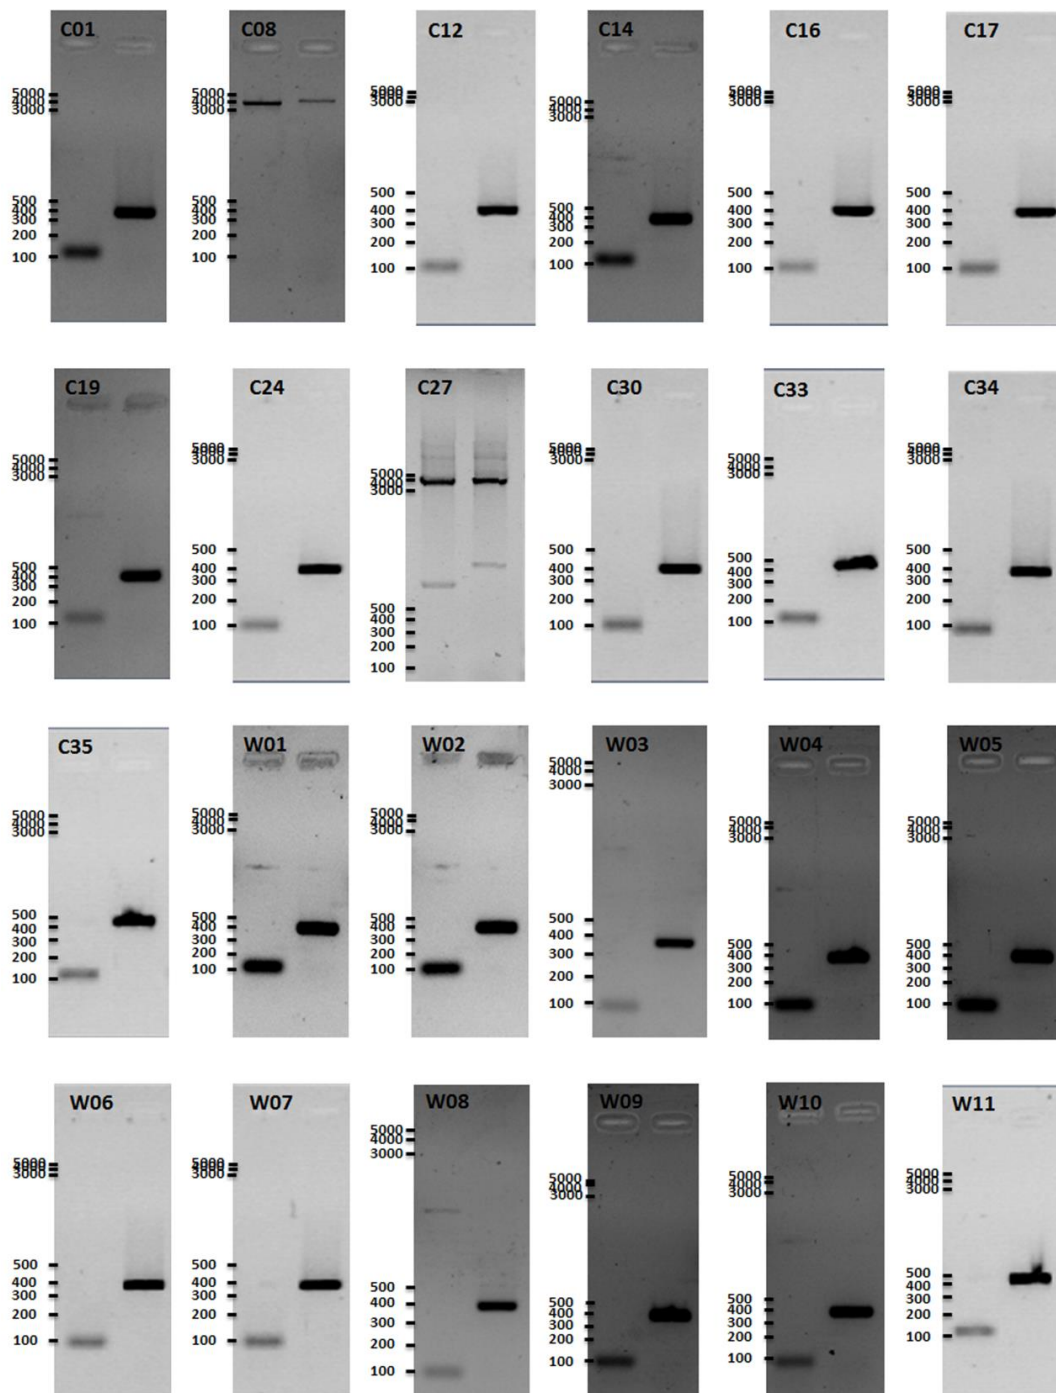

**Supplementary Figure 8.** Detection of Ty1/copia retrotransposon insertion in *GmCHX1* of 24 soybean germplasms using PCR. The primers In1F and In2F are used as forward primers and In8F is used as a reverse primer as shown in **Figure 2d** in the main text. The specific sizes of bands with and without insertion can be found in **Supplementary Figure 6**.



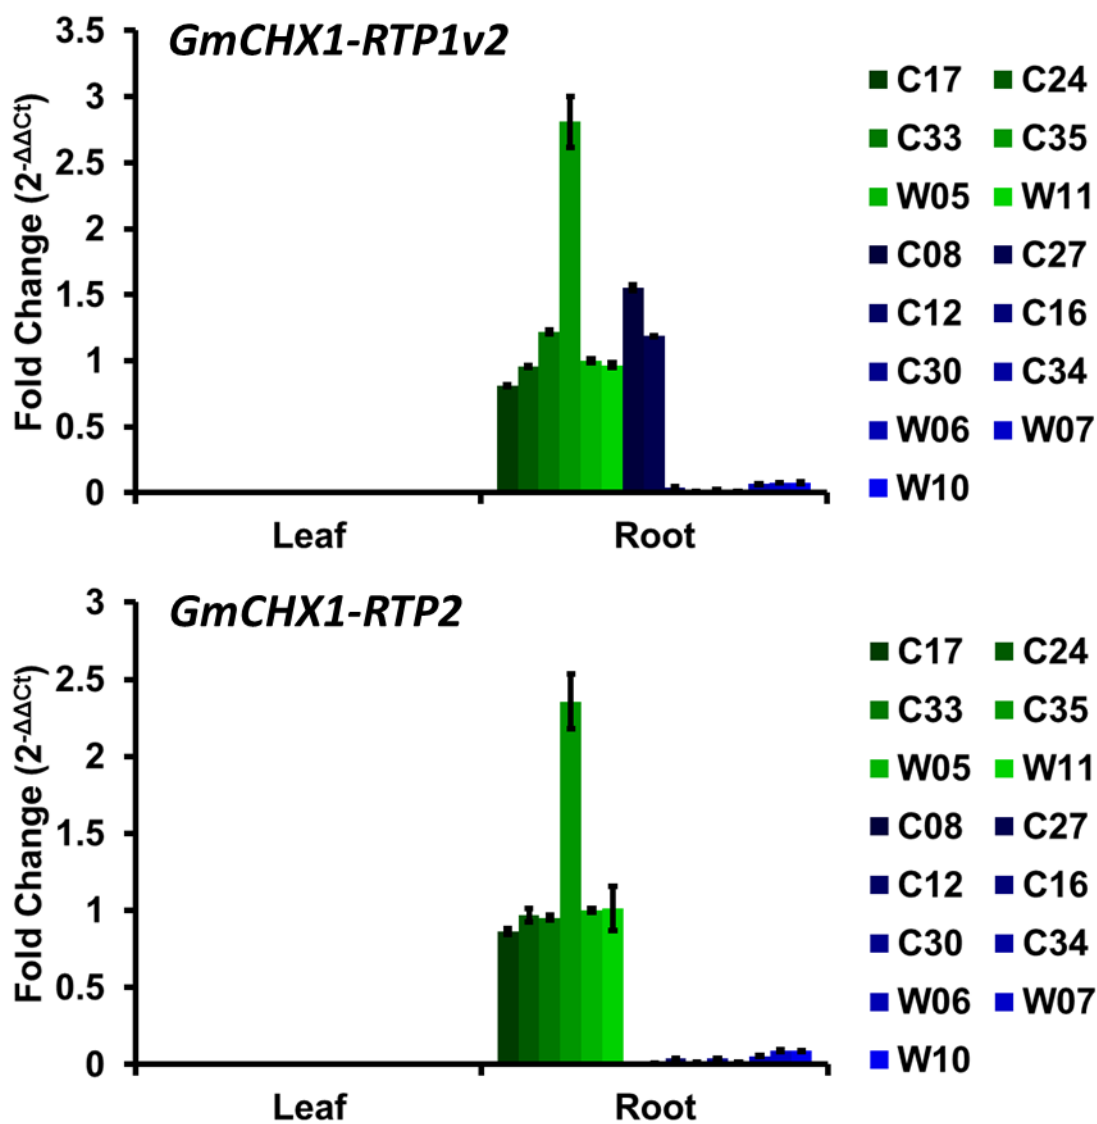

**Supplementary Figure 9.** Additional expression studies of *GmCHX1* in characterized soybean germplasms. Real-time PCR of the *GmCHX1* gene using primers specific to regions upstream or downstream of the retrotransposon insertion site in C08, with RNA from salt-tolerant (green bars) and salt-sensitive germplasms (blue bars). N=3. Error bar: standard errors.

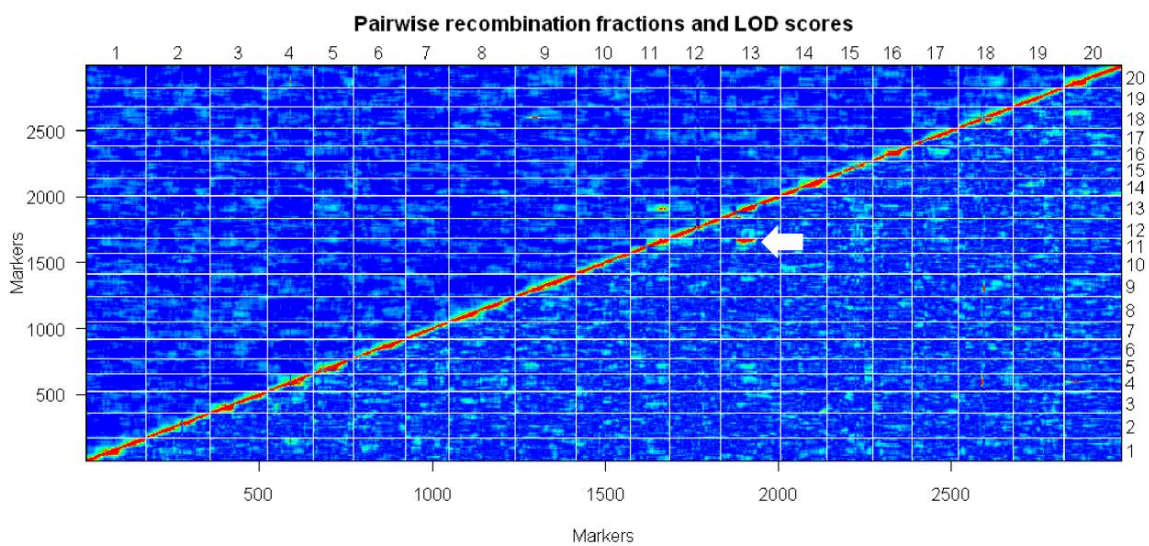

**Supplementary Figure 10.** Recombination fractions and LOD scores of the whole soybean genome. Upper left triangle: estimated recombination fractions for all markers; lower right triangle: LOD scores. Red indicates an LOD score  $\geq 10$  or a small recombination fraction; blue indicates an LOD score  $< 10$  or a large recombination fraction. The white arrow indicates a recombination hot spot which may involve translocation events<sup>8</sup>.

**Supplementary Table 1.** Sequencing libraries and statistics of clean reads.

| <b>Insertion size (bp)</b> | <b>Total data (Gb)</b> | <b>Read length (bp)</b> | <b>Sequencing depth (X)</b> |
|----------------------------|------------------------|-------------------------|-----------------------------|
| 180                        | 4.6                    | 75                      | 3.95                        |
| 260                        | 27.4                   | 75                      | 23.52                       |
| 326                        | 11.4                   | 75                      | 9.79                        |
| 817                        | 8.0                    | 75/44                   | 6.87                        |
| 2k                         | 4.1                    | 44                      | 3.52                        |
| 2.3k                       | 9.5                    | 44                      | 8.15                        |
| 6k                         | 2.3                    | 44                      | 1.97                        |
| 10k                        | 6.2                    | 44                      | 5.32                        |
| Total                      | 73.5                   | -                       | 63.09                       |

**Supplementary Table 2.** Statistics of SOAPdenovo-assembled soybean genome.

|                                  | <b>Contig</b>   |               | <b>Scaffold</b> |               |
|----------------------------------|-----------------|---------------|-----------------|---------------|
|                                  | <b>Size(bp)</b> | <b>Number</b> | <b>Size(bp)</b> | <b>Number</b> |
| <b>N90</b>                       | 3,427           | 40,973        | 43,843          | 3,281         |
| <b>N80</b>                       | 7,996           | 25,959        | 88,676          | 1,910         |
| <b>N70</b>                       | 12,865          | 18,043        | 154,429         | 1,171         |
| <b>N60</b>                       | 18,132          | 12,762        | 243,754         | 720           |
| <b>N50</b>                       | 24,167          | 8,897         | 401,309         | 442           |
| <b>Longest (bp)</b>              | 295,587         |               | 7,596,757       |               |
| <b>Total Length (bp)</b>         | 808,678,523     |               | 868,000,813     |               |
| <b>Total Number (&gt;200 bp)</b> | 129,013         |               | 34,137          |               |
| <b>Total Number (&gt;2k bp)</b>  | 51,178          |               | 9,008           |               |
| <b>Length of Ns (Mb)</b>         | -               |               | 59              |               |

**Supplementary Table 3.** Statistics of short reads successfully mapped back to the assembled scaffolds.

| <b>Insertion Size (bp)</b> | <b>Reads Number</b> | <b>Mapped (%)</b> | <b>Properly paired (%)</b> |
|----------------------------|---------------------|-------------------|----------------------------|
| 180                        | 61,187,966          | 94.16             | 89.29                      |
| 260                        | 364,899,960         | 93.07             | 82.58                      |
| 326                        | 160,013,874         | 94.44             | 82.19                      |
| 817                        | 156,556,972         | 95.42             | 79.25                      |

**Supplementary Table 4.** Statistics of the gene model prediction.

| Gene set              |                      | Number  | Average gene length (bp) | Average CDS length (bp) | Average no. of exon per gene | Average exon length (bp) | Average intron length (bp) |
|-----------------------|----------------------|---------|--------------------------|-------------------------|------------------------------|--------------------------|----------------------------|
| <i>De novo</i>        | <b>Augustus</b>      | 63,034  | 2485.51                  | 1035.03                 | 4.80                         | 215.73                   | 381.93                     |
|                       | <b>GlimmerHMM</b>    | 69,296  | 2144.68                  | 847.65                  | 3.91                         | 216.75                   | 445.61                     |
| <b>Homology-based</b> | <i>A. thaliana</i>   | 36,183  | 3602.32                  | 1245.63                 | 5.65                         | 220.46                   | 506.80                     |
|                       | <i>C. papaya</i>     | 48,928  | 2526.80                  | 971.26                  | 4.23                         | 229.56                   | 481.44                     |
|                       | <i>M. truncatula</i> | 58,762  | 2457.57                  | 946.45                  | 3.98                         | 237.77                   | 507.00                     |
|                       | <i>G. max</i>        | 65,599  | 2882.28                  | 1056.39                 | 4.92                         | 214.63                   | 465.57                     |
| <b>EST(NCBI)</b>      |                      | 62,638  | 1435.87                  | 632.29                  | 3.11                         | 203.18                   | 380.48                     |
| <b>RNA-Seq</b>        |                      | 252,055 | 3031.92                  | 1270.02                 | 4.83                         | 262.75                   | 459.60                     |
| <b>Final gene set</b> |                      | 52,395  | 3398.43                  | 1083.93                 | 4.87                         | 222.59                   | 503.55                     |

Integrated gene model strategy including *de novo* prediction (programs: Augustus, Glimmer-HMM), homologue searching (*A. thaliana*, *C. papaya*, *M. truncatula* and *G. max*), RNA-seq (W05) data supporting and EST (*G. soja* and *G. max* from NCBI database) data supporting. All gene models are combined by GLEAN to give a final gene set.

**Supplementary Table 5.** Functional annotation of W05 genes.

|                     | <b>Number</b> | <b>Percentage</b> |
|---------------------|---------------|-------------------|
| <b>Total</b>        | 52,395        | 100               |
| <b>Annotated</b>    | 49,560        | 94.59             |
| <b>Swissprot</b>    | 36,827        | 70.29             |
| <b>TrEMBL</b>       | 49,475        | 94.43             |
| <b>InterPro</b>     | 38,505        | 73.49             |
| <b>KEGG</b>         | 28,781        | 54.93             |
| <b>GO</b>           | 28,611        | 54.61             |
| <b>Un-annotated</b> | 2,835         | 5.41              |

**Supplementary Table 6.** Rate of Trinity-assembled contigs mapping back to the annotated genome.

| <b>Total no. of best CDS candidates</b> | <b>Mapped to W05 annotated genome (No. (%))</b> |
|-----------------------------------------|-------------------------------------------------|
| 32,102                                  | 28,973 (90%)                                    |

**Supplementary Table 7.** Core Eukaryotic Genes Mapping Approach (CEGMA) analysis.

|                    |                 | <b>No. of Core Proteins Identified</b> | <b>Completeness</b> |
|--------------------|-----------------|----------------------------------------|---------------------|
| <b>Williams 82</b> | <b>Complete</b> | 224                                    | 90.32%              |
|                    | <b>Partial</b>  | 243                                    | 97.98%              |
| <b>W05</b>         | <b>Complete</b> | 215                                    | 86.69%              |
|                    | <b>Partial</b>  | 240                                    | 96.77%              |

**Supplementary Table 8.** Statistics of ncRNA annotated in the W05 genome.

| <b>Type</b>  |              | <b>Copy</b> | <b>Average length (bp)</b> | <b>Total length (bp)</b> | <b>Percentage in genome</b> |
|--------------|--------------|-------------|----------------------------|--------------------------|-----------------------------|
| <b>miRNA</b> |              | <b>376</b>  | <b>122.22</b>              | <b>45,953</b>            | <b>0.00529</b>              |
| <b>tRNA</b>  |              | <b>864</b>  | <b>75.11</b>               | <b>64,898</b>            | <b>0.00748</b>              |
| <b>rRNA</b>  | <b>Total</b> | <b>100</b>  | <b>133.12</b>              | <b>13,312</b>            | <b>0.00153</b>              |
|              | 18S          | 28          | 192.96                     | 5,403                    | 0.00062                     |
|              | 28S          | 16          | 119.63                     | 1,914                    | 0.00022                     |
|              | 5.8S         | 3           | 113.33                     | 340                      | 0.00004                     |
|              | 5S           | 53          | 106.70                     | 5,655                    | 0.00065                     |
| <b>snRNA</b> | <b>Total</b> | <b>437</b>  | <b>106.17</b>              | <b>46,398</b>            | <b>0.00535</b>              |
|              | CD-box       | 301         | 94.08                      | 28,318                   | 0.00326                     |
|              | HACA-box     | 45          | 120.53                     | 5,424                    | 0.00062                     |
|              | splicing     | 91          | 139.08                     | 12,656                   | 0.00146                     |

**Supplementary Table 9.** Statistics of repeat contents in the W05 genome.

| <b>Repeat Class</b>   |              | <b>Repeat length</b> | <b>Percentage</b> |
|-----------------------|--------------|----------------------|-------------------|
| <b>DNA transposon</b> | <b>Total</b> | <b>57,532,948</b>    | <b>6.63</b>       |
|                       | CMC          | 9,224,152            | 1.06              |
|                       | hAT          | 5,479,340            | 0.63              |
|                       | MULE         | 8,726,061            | 1.01              |
|                       | TcMar        | 388,955              | 0.04              |
|                       | CACTA        | 3,063,982            | 0.35              |
|                       | Mutator      | 12,347,579           | 1.42              |
|                       | Helitron     | 2,763,885            | 0.32              |
|                       | other        | 15,538,994           | 1.79              |
| <b>LTR</b>            | <b>Total</b> | <b>268,111,653</b>   | <b>30.89</b>      |
|                       | Gypsy        | 163,812,079          | 18.87             |
|                       | Copia        | 83,752,475           | 9.65              |
|                       | Caulimovirus | 1,992,703            | 0.23              |
|                       | ERV          | 121,687              | 0.01              |
|                       | other        | 18,432,709           | 2.12              |
| <b>Non-LTR</b>        | <b>LINE</b>  | <b>16,640,627</b>    | <b>1.92</b>       |
|                       | L1           | 13,605,914           | 1.57              |
|                       | L2           | 84,907               | 0.01              |
|                       | RTE          | 2,573,153            | 0.30              |
|                       | other        | 376,653              | 0.04              |
|                       | <b>SINE</b>  | <b>1,204,272</b>     | <b>0.14</b>       |
|                       | tRNA-Like    | 888,579              | 0.10              |
|                       | other        | 315,693              | 0.04              |
| <b>Low complexity</b> |              | <b>3,218,693</b>     | <b>0.37</b>       |
| <b>Simple repeat</b>  |              | <b>12,984,986</b>    | <b>1.50</b>       |
| <b>Satellite</b>      |              | <b>1,875,157</b>     | <b>0.22</b>       |
| <b>Other</b>          |              | <b>346,855</b>       | <b>0.04</b>       |
| <b>Novel/Unknown</b>  |              | <b>14,841,785</b>    | <b>1.71</b>       |
| <b>Total</b>          |              | <b>376,756,976</b>   | <b>43.41</b>      |



**Supplementary Table 10.** Measurement methods for different agronomic traits.

| Agronomic Traits <sup>a</sup> |                                       | Wild Parent (W05) | Cultivated Parent (C08) | Phenotypes recorded for 96 RI lines                                                                                                                                                                                                                                                                                                                                                                                                                                                                                                                                                                                                                                                                                                                                                                                                                                                      |
|-------------------------------|---------------------------------------|-------------------|-------------------------|------------------------------------------------------------------------------------------------------------------------------------------------------------------------------------------------------------------------------------------------------------------------------------------------------------------------------------------------------------------------------------------------------------------------------------------------------------------------------------------------------------------------------------------------------------------------------------------------------------------------------------------------------------------------------------------------------------------------------------------------------------------------------------------------------------------------------------------------------------------------------------------|
| Seed Nutritional Quality      | Seed Antioxidant Content <sup>b</sup> | Higher            | Lower                   | Trolox equivalent antioxidant capacity (TEAC) assay was used. In brief, antioxidant from 0.5 g soybean seed powder was extracted using HCl-acidified methanol. Antioxidant activities were determined by measuring the decrease in absorbance at 734 nm upon the reduction of ABTS <sup>+</sup> radicals by antioxidants in the sample. An antioxidation activity of trolox was used as the standard for quantitative measurement. Each data point represents the average value of 3 random samples from pooled seeds of each line; 3-year record.                                                                                                                                                                                                                                                                                                                                       |
|                               | Seed Anthocyanin Content <sup>c</sup> | Higher            | Lower                   | Total anthocyanin assay. In brief, anthocyanin was extracted from 0.5 g soybean seed powder using 80% methanol with 0.1 N HCl. Monomeric anthocyanin pigment contents were determined with the differential $A_{520nm} - A_{700nm}$ at pH 1.0 (KCl buffer) and pH 4.5 (NaOAc buffer). Anthocyanin content was calculated as cyanidin-3-glucoside-equivalence using the formula: $(A \times MW \times DF \times 1000) \div (\epsilon \times l)$ where A is $(A_{520nm} - A_{700nm})$ at pH 1.0 – $(A_{520nm} - A_{700nm})$ at pH 4.5, MW is the molecular weight of cyanidin-3-glucoside (449.2 g mol <sup>-1</sup> ), DF is the dilution factor and $\epsilon$ is the molar extinction coefficient of cyanidin-3-glucoside (26,900) and $l$ is the length of light path. Each data point represents the average value of 3 random samples from pooled seeds of each line; 3-year record. |
|                               | Seed Oil Content <sup>d</sup>         | Lower             | Higher                  | AOAC Official Method was used. In brief, 2g of soybean seed powder was digested                                                                                                                                                                                                                                                                                                                                                                                                                                                                                                                                                                                                                                                                                                                                                                                                          |

|               |                                   |        |        |                                                                                                                                                                                                                                                                                                                                                                                                                                                                                                                                                                                                                                                                                                                                                                                                                                                                                                                     |
|---------------|-----------------------------------|--------|--------|---------------------------------------------------------------------------------------------------------------------------------------------------------------------------------------------------------------------------------------------------------------------------------------------------------------------------------------------------------------------------------------------------------------------------------------------------------------------------------------------------------------------------------------------------------------------------------------------------------------------------------------------------------------------------------------------------------------------------------------------------------------------------------------------------------------------------------------------------------------------------------------------------------------------|
|               |                                   |        |        | with HCl in 80°C water bath. Fat/oil was extracted with ethanol:ether:petroleum ether mixture (10 ml:25 ml:25 ml). Fat/Oil content was determined by weight after the solvent was completely evaporated. Each data point represents the average value of 3 random samples from pooled seeds of each line; 2-year record.                                                                                                                                                                                                                                                                                                                                                                                                                                                                                                                                                                                            |
|               | Seed Protein Content <sup>e</sup> | Higher | Lower  | AOAC Official Method was used. In brief, 2g of soybean seed powder was digested with H <sub>2</sub> SO <sub>4</sub> at 420 °C. Proteins were converted to NH <sub>3</sub> by Kjeldahl catalyst. NH <sub>3</sub> was distilled and titrated using standardized HCl to estimate the protein content using the equation: $\frac{(V_{sample}-V_{blank}) \times M \times A}{W \times 10} \times F$ , where V <sub>sample</sub> is the volume of standardized acid used to titrate a sample, V <sub>blank</sub> is the volume of standardized acid to titrate the blank, M is the molarity of standardized acid, A is the atomic mass of N (14.01), W is the weight of sample, 10 is the percentage conversion factor, and F is the conversion factor from percentage nitrogen to protein content (6.25). Each data point represents the average value of 3 random samples from pooled seeds of each line; 3-year record. |
| Yield Related | Pod Number Per Plant              | Higher | Lower  | Number of pod per plant was counted at growth stage R8. Each data point represents the average value of 8 to 10 randomly selected plants for each line; 2-year record.                                                                                                                                                                                                                                                                                                                                                                                                                                                                                                                                                                                                                                                                                                                                              |
|               | Seed Number Per Plant             | Higher | Lower  | Seeds were harvested and counted at growth stage R8. Each data point represents the average value of 8 to 10 randomly selected plants for each line; 2-year record.                                                                                                                                                                                                                                                                                                                                                                                                                                                                                                                                                                                                                                                                                                                                                 |
|               | 100-Seed Weight                   | Lower  | Higher | Seeds were harvested, air-dried and weighed at growth stage R8. Each data point represents the average value of 3 batches of 100 seeds randomly picked from a seed pool of 20 to 40 plants of each line; 3-year record.                                                                                                                                                                                                                                                                                                                                                                                                                                                                                                                                                                                                                                                                                             |

|                  |                             |          |           |                                                                                                                                                                                                                                                                                                                                                                                                                                                                                                                  |
|------------------|-----------------------------|----------|-----------|------------------------------------------------------------------------------------------------------------------------------------------------------------------------------------------------------------------------------------------------------------------------------------------------------------------------------------------------------------------------------------------------------------------------------------------------------------------------------------------------------------------|
| Growth Period    | Growth Period               | Longer   | Shorter   | From the first day after sowing (June) to growth stage R8 (September to October); 3-year record.                                                                                                                                                                                                                                                                                                                                                                                                                 |
| Stress Tolerance | Salt Tolerance <sup>f</sup> | Tolerant | Sensitive | Salt damage index = $\frac{\sum CiNi}{SN} \times 100\%$ ; Ci: degree of damage, Ni: no. of plants with the corresponding degree of damage (scaled from 0 to 5, where 0 refers no observable damage and 5 refers to lethal damage to the terminal bud), N: Total no. of plants, S: highest degree of damage (= 5 in this scale). Each data point represents the average value of triplicates from 6 randomly selected young seedlings (with 2 primary leaves opened); two independent experiments were performed. |
| Coloration       | Seed Coat Color             | Black    | Yellow    | The major color of dried seeds: 1: yellow; 2: brown; 3: black; 2-year record.                                                                                                                                                                                                                                                                                                                                                                                                                                    |
|                  | Pod Color                   | Black    | Tan       | Recorded at growth stage R8: 1: tan; 2: grayish brown; 3: brown; 4: dark brown; 5: black; 2-year record.                                                                                                                                                                                                                                                                                                                                                                                                         |
| Plant Morphology | Trailing Growth             | Trailing | Erect     | Recorded at growth stage R4-R6: 1: erect; 2: semi-erect; 3: semi-trailing; 4: trailing; 2-year record.                                                                                                                                                                                                                                                                                                                                                                                                           |
|                  | Leaf Length/Width Ratio     | Larger   | Smaller   | The middle leaflets of a mature trifoliolate located in the middle node were collected at growth stage R3-R5. The leaf length and leaf width were measured by Image-pro-plus (version 6.0.0); 3-year record.                                                                                                                                                                                                                                                                                                     |
|                  | Leaf Area                   | Smaller  | Larger    | The middle leaflets of a mature trifoliolate located in the middle node were collected at growth stage R3-R5. The leaf area was measured by Image-pro-plus (version 6.0.0); 3-year record.                                                                                                                                                                                                                                                                                                                       |
|                  | Plant Height                | Longer   | Shorter   | Plant height was measured from first node (cotyledon) to the apex of plant at growth stage R8. Each data point represents the average of 8 to 10 randomly selected plants                                                                                                                                                                                                                                                                                                                                        |

|                                           |                      |               |           |                                                                                                                                                                                                                                                                                                                                                                                                                                               |
|-------------------------------------------|----------------------|---------------|-----------|-----------------------------------------------------------------------------------------------------------------------------------------------------------------------------------------------------------------------------------------------------------------------------------------------------------------------------------------------------------------------------------------------------------------------------------------------|
|                                           |                      |               |           | for each line; 2-year record.                                                                                                                                                                                                                                                                                                                                                                                                                 |
|                                           | Node Number          | Larger        | Smaller   | Each data point represents the average of the number of nodes on the main stem from 8 to 10 randomly selected plants at growth stage R8 for each line; 2-year record.                                                                                                                                                                                                                                                                         |
|                                           | Branch Number        | Larger        | Smaller   | Each data point represents the average number of effective branches (branches with more than one mature pods and more than two nodes) from 8 to 10 randomly selected plants at growth stage R8 for each line; 2-year record.                                                                                                                                                                                                                  |
| Nodulation by <i>S. fredii</i> CCBAU25509 | Nodule No. Per Plant | Nodule formed | No nodule | The Rhizobium strain <i>Sinorhizobium fredii</i> CCBAU25509 was cultured on yeast extract mannitol broth <sup>9</sup> for 48 h and then diluted to OD600 = 0.6. Surface-sterilized <sup>10</sup> seeds were grown in autoclaved vermiculite mixed with B&D medium <sup>11</sup> . Each soybean plant was inoculated with 1 ml of Rhizobium suspension. The number of root nodules formed on each plant was counted 4 weeks after inoculation. |

<sup>a</sup> The plants for salt damage index recording and the nodulation experiment were performed in a greenhouse setting in the Chinese University of Hong Kong with the temperature ranging from 22-30 °C, and the humidity at 75-90% (2010 to 2012). For the other measurements, the 96 core RI lines and their parents were planted in the field at the experimental farm of Qing County (38° 35' 0" N, 116° 48' 0" E) in Hebei Province, China, during the growth season - June to October (2009 to 2011). For nutritional analyses, whole soybean seeds were powdered with a sample mill using a 0.5 mm screen (Foss, Model: 1093 Cyclotec).

<sup>b</sup> Methods were according to Miller et al (1996) <sup>12</sup>.

<sup>c</sup> Methods were according to AOAC Official Method 2005.02.

<sup>d</sup> Methods were according to AOAC Official Method 922.06.

<sup>e</sup> Methods were according to AOAC Official Method 2001.11.

<sup>f</sup> Soybean seeds were germinated on vermiculite in a greenhouse. Seedlings were irrigated with half-strength Hoagland's solution with 1.8% (w/v) NaCl at the primary-leaf stage. The salt damage symptoms were recorded every 3 days. Salt damage index scores were assessed as previously described <sup>13</sup>.

**Supplementary Table 11.** Summary of the re-sequencing data of 96 core RI lines.

| <b>RI line ID</b> | <b>Read No.</b> | <b>Mapping Rate (%)</b> | <b>Properly paired and uniquely mapped (bases)</b> | <b>Cov (%)</b> | <b>Heterozygosity</b> |
|-------------------|-----------------|-------------------------|----------------------------------------------------|----------------|-----------------------|
| R01               | 13081398        | 86.46                   | 502251125                                          | 52.87          | 0.002                 |
| R02               | 12032834        | 86.92                   | 477793784                                          | 50.29          | 0.002                 |
| R03               | 12124934        | 86.85                   | 481759841                                          | 50.71          | 0.002                 |
| R04               | 12211424        | 87.43                   | 490979601                                          | 51.68          | 0.002                 |
| R05               | 12721766        | 87.09                   | 493656995                                          | 51.96          | 0.002                 |
| R06               | 11463280        | 88.14                   | 476766703                                          | 50.19          | 0.002                 |
| R07               | 14399146        | 86.25                   | 529384433                                          | 55.72          | 0.002                 |
| R08               | 10689498        | 86.42                   | 441926678                                          | 46.52          | 0.002                 |
| R09               | 14027912        | 86.95                   | 525066179                                          | 55.27          | 0.002                 |
| R10               | 12966572        | 86.47                   | 503569819                                          | 53.01          | 0.002                 |
| R11               | 13899200        | 87.37                   | 524201664                                          | 55.18          | 0.003                 |
| R12               | 13056478        | 88.74                   | 522338401                                          | 54.98          | 0.002                 |
| R13               | 14318894        | 87.9                    | 536323427                                          | 56.46          | 0.003                 |
| R14               | 14309310        | 85.16                   | 527464482                                          | 55.52          | 0.003                 |
| R15               | 14551542        | 86.35                   | 538368852                                          | 56.67          | 0.004                 |
| R16               | 13161244        | 84.75                   | 501212930                                          | 52.76          | 0.002                 |
| R17               | 14492334        | 88.18                   | 546707953                                          | 57.55          | 0.002                 |
| R18               | 13867474        | 89.02                   | 540222518                                          | 56.87          | 0.002                 |
| R19               | 12038962        | 86.96                   | 479826084                                          | 50.51          | 0.002                 |
| R20               | 12535010        | 87.52                   | 497469312                                          | 52.37          | 0.002                 |
| R21               | 13522782        | 86.97                   | 512531573                                          | 53.95          | 0.002                 |
| R22               | 12574538        | 87.73                   | 505145541                                          | 53.17          | 0.003                 |
| R23               | 13921542        | 87.45                   | 525937850                                          | 55.36          | 0.002                 |
| R24               | 14260342        | 88.57                   | 545494549                                          | 57.42          | 0.002                 |
| R25               | 16945956        | 86.3                    | 582537377                                          | 61.32          | 0.003                 |
| R26               | 15237508        | 88.66                   | 568480986                                          | 59.84          | 0.003                 |
| R27               | 13527038        | 86.71                   | 517157929                                          | 54.44          | 0.003                 |
| R28               | 14076302        | 87.34                   | 531267252                                          | 55.92          | 0.002                 |
| R29               | 15395946        | 88.4                    | 575978017                                          | 60.63          | 0.003                 |
| R30               | 12477462        | 86.91                   | 493878421                                          | 51.99          | 0.002                 |
| R31               | 12756208        | 82.75                   | 477569910                                          | 50.27          | 0.002                 |
| R32               | 11531900        | 82.81                   | 449357645                                          | 47.30          | 0.002                 |

|     |          |       |           |       |       |
|-----|----------|-------|-----------|-------|-------|
| R33 | 12047300 | 82.84 | 456561294 | 48.06 | 0.002 |
| R34 | 13900976 | 81.65 | 491809505 | 51.77 | 0.002 |
| R35 | 13235946 | 82.51 | 488970546 | 51.47 | 0.002 |
| R36 | 13095498 | 82.63 | 478033767 | 50.32 | 0.002 |
| R37 | 15532164 | 83.03 | 542551279 | 57.11 | 0.002 |
| R38 | 14669920 | 81.44 | 502826223 | 52.93 | 0.002 |
| R39 | 12654884 | 82.07 | 464612987 | 48.91 | 0.002 |
| R40 | 10913832 | 82.2  | 423653267 | 44.60 | 0.001 |
| R41 | 10874032 | 81.64 | 421733649 | 44.39 | 0.002 |
| R42 | 12102384 | 85.1  | 475530241 | 50.06 | 0.002 |
| R43 | 12743300 | 85.96 | 500517894 | 52.69 | 0.002 |
| R44 | 11719326 | 85.39 | 465418251 | 48.99 | 0.002 |
| R45 | 13152174 | 85.81 | 506058932 | 53.27 | 0.002 |
| R46 | 13851874 | 85.25 | 515828769 | 54.30 | 0.002 |
| R47 | 12237926 | 85.22 | 475259015 | 50.03 | 0.002 |
| R48 | 12609218 | 86.09 | 494708848 | 52.07 | 0.002 |
| R49 | 13140184 | 85.06 | 496896443 | 52.30 | 0.002 |
| R50 | 10700396 | 85.64 | 443208396 | 46.65 | 0.002 |
| R51 | 11033998 | 85.04 | 441796028 | 46.50 | 0.002 |
| R52 | 10161538 | 84.73 | 419344613 | 44.14 | 0.001 |
| R53 | 11480034 | 84.99 | 458847929 | 48.30 | 0.002 |
| R54 | 11411480 | 84.32 | 452098328 | 47.59 | 0.002 |
| R55 | 11380134 | 86.48 | 471068218 | 49.59 | 0.002 |
| R56 | 11072392 | 85.01 | 442359512 | 46.56 | 0.002 |
| R57 | 13989886 | 84.78 | 515650083 | 54.28 | 0.002 |
| R58 | 10907500 | 84.56 | 441932379 | 46.52 | 0.002 |
| R59 | 10509924 | 84.54 | 435965241 | 45.89 | 0.002 |
| R60 | 11011364 | 84.43 | 439088785 | 46.22 | 0.002 |
| R61 | 11978824 | 86.01 | 481303735 | 50.66 | 0.002 |
| R62 | 10862624 | 84.02 | 433807767 | 45.66 | 0.002 |
| R63 | 8829392  | 83.63 | 369726381 | 38.92 | 0.001 |
| R64 | 10972392 | 88.1  | 433037037 | 45.58 | 0.003 |
| R65 | 9098954  | 89.11 | 383045512 | 40.32 | 0.002 |
| R66 | 10444410 | 87.85 | 417797290 | 43.98 | 0.003 |
| R67 | 9388098  | 89.69 | 397561539 | 41.85 | 0.002 |
| R68 | 9658042  | 88.65 | 396518128 | 41.74 | 0.002 |
| R69 | 10464038 | 88.21 | 415369040 | 43.72 | 0.003 |

|     |          |       |           |       |       |
|-----|----------|-------|-----------|-------|-------|
| R70 | 11575688 | 88.32 | 447032299 | 47.06 | 0.003 |
| R71 | 10811610 | 87.44 | 431850195 | 45.46 | 0.003 |
| R72 | 9189578  | 87.51 | 380202879 | 40.02 | 0.002 |
| R73 | 13784458 | 89.35 | 495433511 | 52.15 | 0.004 |
| R74 | 10582092 | 88.59 | 422671774 | 44.49 | 0.003 |
| R75 | 14771240 | 84.92 | 531721929 | 55.97 | 0.002 |
| R76 | 15780440 | 84.5  | 557476672 | 58.68 | 0.003 |
| R77 | 14570446 | 85.83 | 538314766 | 56.66 | 0.002 |
| R78 | 13599320 | 85.77 | 516344266 | 54.35 | 0.002 |
| R79 | 15694070 | 85.76 | 553450220 | 58.26 | 0.003 |
| R80 | 15198202 | 85.18 | 534976048 | 56.31 | 0.003 |
| R81 | 15253650 | 86.3  | 553568836 | 58.27 | 0.002 |
| R82 | 13886792 | 85.63 | 514718356 | 54.18 | 0.002 |
| R83 | 14411672 | 86.62 | 537563494 | 56.59 | 0.002 |
| R84 | 12572850 | 86.57 | 491660680 | 51.75 | 0.002 |
| R85 | 12349628 | 85.13 | 478613566 | 50.38 | 0.002 |
| R86 | 14141942 | 87.03 | 533875413 | 56.20 | 0.002 |
| R87 | 13215086 | 86.59 | 506111255 | 53.27 | 0.002 |
| R88 | 15879770 | 87.23 | 570823223 | 60.09 | 0.002 |
| R89 | 15855932 | 86.34 | 560243008 | 58.97 | 0.003 |
| R90 | 15545988 | 86.93 | 567973403 | 59.79 | 0.002 |
| R91 | 14926364 | 87.06 | 550483665 | 57.95 | 0.002 |
| R92 | 16771988 | 85.99 | 576087083 | 60.64 | 0.003 |
| R93 | 12738494 | 86.95 | 504889676 | 53.15 | 0.002 |
| R94 | 16239624 | 86.12 | 574249789 | 60.45 | 0.003 |
| R95 | 13770322 | 85.74 | 511555412 | 53.85 | 0.002 |
| R96 | 15404446 | 86.06 | 555113606 | 58.43 | 0.003 |

**Supplementary Table 12.** Detailed information on the previously identified QTLs and their putative causal genes

| <b>Agronomic Traits</b> | <b>QTL Locus Identified in Previous Studies</b> | <b>Putative causal gene and its functions</b>                                                                                                                                                                                                                                                      | <b>References</b> |
|-------------------------|-------------------------------------------------|----------------------------------------------------------------------------------------------------------------------------------------------------------------------------------------------------------------------------------------------------------------------------------------------------|-------------------|
| Growth Period           | <i>E1 (E1)</i>                                  | <i>E1</i> contains an intron-free gene that suppresses flowering and delays maturity.                                                                                                                                                                                                              | 14                |
|                         | <i>E2 (GmG1a)</i>                               | A <i>GmG1a</i> gene, which is a homolog of <i>GIGANTEA</i> in <i>A. thaliana</i> , is identified as a candidate for the <i>E2</i> locus.                                                                                                                                                           | 15                |
| Salt Tolerance          | <i>Ncl</i>                                      | Not reported                                                                                                                                                                                                                                                                                       | 16, 17, 18, 19    |
| Seed Coat Color         | <i>I (CHS gene cluster)</i>                     | The <i>I</i> locus on Chr08 contains several <i>CHS</i> genes (encoding chalcone synthase, a key biosynthetic enzyme for anthocyanin and proanthocyanidins). It was reported that the yellow seed coat color of cultivated soybeans was due to tissue-specific RNAi silencing of <i>CHS</i> genes. | 20                |
| Leaf Length/Width Ratio | <i>Ln (Gm-JAGGED1)</i>                          | <i>Ln</i> locus on Chr20 contains the <i>Gm-JAGGED1</i> gene (homologous to the <i>JAG</i> gene in <i>Arabidopsis thaliana</i> which encodes a regulator of lateral organ development and fruit patterning).                                                                                       | 21, 22            |
| Nodule No. Per Plant    | <i>Rj2 (Rj2)</i>                                | <i>Rj2</i> locus that harbors a resistance gene involved in rhizobia infection specificity.                                                                                                                                                                                                        | 23                |



**Supplementary Table 13.** Correlation between selected traits. <sup>a</sup>

| <b>Year</b> | <b>Trait</b>          |                          | <b>Kendall's tau_b</b> | <b>Spearman's rho</b> |
|-------------|-----------------------|--------------------------|------------------------|-----------------------|
| 2010        | Seed Coat Color       | Seed Anthocyanin Content | .662**                 | .823**                |
|             | Pod Color             | Seed Antioxidant Content | .329**                 | .423**                |
|             | Pod Number Per Plant  | Trailing Growth          | .483**                 | .614**                |
|             | Pod Number Per Plant  | Seed Number Per Plant    | .822**                 | .954**                |
|             | Seed Number Per Plant | Trailing Growth          | .487**                 | .621**                |
| 2011        | Pod Number Per Plant  | Trailing Growth          | .431**                 | .544**                |
|             | Pod Number Per Plant  | Seed Number Per Plant    | .861**                 | .969**                |
|             | Seed Number Per Plant | Trailing Growth          | .447**                 | .562**                |

<sup>a</sup> Kendall's tau\_b and Spearman's rho values were calculated using the Predictive Analytics Suite Workstation Statistics (PASW Statistics 18.0.0). \*\*  $p < 0.001$ .

## Supplementary References

1. Lander ES, Waterman MS. Genomic mapping by fingerprinting random clones: A mathematical analysis. *Genomics* **2**, 231-239 (1988).
2. Zhang G, *et al.* Genome sequence of foxtail millet (*Setaria italica*) provides insights into grass evolution and biofuel potential. *Nature Biotechnol* **30**, 549-554 (2012).
3. Du J, *et al.* Pericentromeric effects shape the patterns of divergence, retention, and expression of duplicated genes in the paleopolyploid soybean. *Plant Cell* **24**, 21-32 (2012).
4. Livak KJ, Schmittgen TD. Analysis of relative gene expression data using real-time quantitative PCR and the 2(T)(-Delta Delta C) method. *Methods* **25**, 402-408 (2001).
5. Phang TH, Shao G, Liao H, Yan X, Lam HM. High external phosphate (Pi) increases sodium ion uptake and reduces salt tolerance of 'Pi-tolerant' soybean. *Physiol Plant* **135**, 412-425 (2009).
6. Su X-Z, Wu Y, Sifri CD, Wellems TE. Reduced extension temperatures required for PCR amplification of extremely A+T-rich DNA. *Nucleic Acids Res* **24**, 1574-1575 (1996).
7. Tamura K, Peterson D, Peterson N, Stecher G, Nei M, Kumar S. MEGA5: molecular evolutionary genetics analysis using maximum likelihood, evolutionary distance, and maximum parsimony methods. *Mol Biol Evol* **28**, 2731-2739 (2011).
8. Findley SD, *et al.* A fluorescence *in situ* hybridization system for karyotyping soybean. *Genetics* **185**, 727-744 (2010).
9. JP V. A manual for the practical study of the root-nodule bacteria. *A manual for the practical study of the root-nodule bacteria*, 164 (1970).
10. Kereszt A, *et al.* *Agrobacterium rhizogenes*-mediated transformation of soybean to study root biology. *Nature Protoc* **2**, 948-952 (2007).
11. Imaizumi-Anraku H, Kawaguchi M, Koiwa H, Akao S, Syōno K. Two ineffective-nodulating mutants of *Lotus japonicus*—different phenotypes caused by the blockage of endocytotic bacterial release and nodule maturation. *Plant Cell Physiol* **38**, 871-881 (1997).
12. Miller NJ, Sampson J, Candeias LP, Bramley PM, Rice-Evans CA. Antioxidant activities of carotenes and xanthophylls. *FEBS Letters* **384**, 240-242 (1996).
13. Shao G, Song J. Preliminary studies on the evaluation of salt tolerance in soybean varieties. *Agr Sci China* **6**, 30-35 (1986).
14. Xia Z, *et al.* Positional cloning and characterization reveal the molecular basis for soybean maturity locus *E1* that regulates photoperiodic flowering. *Proc Natl Acad Sci USA* **109**, E2155–E2164 (2012).

15. Watanabe S, *et al.* A map-based cloning strategy employing a residual heterozygous line reveals that the *GIGANTEA* gene is involved in soybean maturity and flowering. *Genetics* **188**, 395-407 (2011).
16. Hall D, Evans AR, Newbury HJ, Pritchard J. Functional analysis of CHX21: a putative sodium transporter in Arabidopsis. *J Exp Bot* **57**, 1201-1210 (2006).
17. Hamwieh A, Tuyen DD, Cong H, Benitez ER, Takahashi R, Xu DH. Identification and validation of a major QTL for salt tolerance in soybean. *Euphytica* **179**, 451-459 (2011).
18. Hamwieh A, Xu D. Conserved salt tolerance quantitative trait locus (QTL) in wild and cultivated soybeans. *Breeding Sci* **58**, 355-359 (2008).
19. Lee GJ, *et al.* A major QTL conditioning salt tolerance in S-100 soybean and descendent cultivars. *Theor Appl Genet* **109**, 1610-1619 (2004).
20. Tuteja JH, Vodkin LO. Structural features of the endogenous silencing and target loci in the soybean genome. *Crop Sci* **48**, S-49-S-68 (2008).
21. Jeong N, Moon J-K, Kim H, Kim C-G, Jeong S-C. Fine genetic mapping of the genomic region controlling leaflet shape and number of seeds per pod in the soybean. *Theor Appl Genet* **122**, 865-874 (2010).
22. Jeong N, *et al.* *Ln* is a key regulator of leaflet shape and number of seeds per pod in soybean. *Plant Cell* **24**, 4807-4818 (2012).
23. Yang S, Tang F, Gao M, Krishnan HB, Zhu H. R gene-controlled host specificity in the legume–rhizobia symbiosis. *Proc Natl Acad Sci USA* **107**, 18735-18740 (2010).
